# Supplementary material for: Hydrogen sulfide gas capture by organic superbase 1,8-diazabicyclo-[5.4.0]-undec-7-ene through salt formation: salt synthesis, characterization and application for CO2capture
Source: Royal Society of Chemistry journal article supplement (doi:10.1039/c8ra02993h), 2018-01-01

## Supporting information

**Title:** Hydrogen sulfide gas capture by organic superbase 1, 8-diazabicyclo-[5.4.0]-undec-7-ene through salt formation: Salt synthesis, characterization and application for CO<sub>2</sub> capture

Santosh Govind Khokarale, Jyri-Pekka Mikkola

**Table S1.** <sup>1</sup>H NMR shifts and signal assignments in spectra of DBU and solid [DBU-H<sub>2</sub>S] adduct (DMSO-d<sub>6</sub> as internal standard)

| DBU                |    |           | solid [DBU-H <sub>2</sub> S] adduct |    |           |
|--------------------|----|-----------|-------------------------------------|----|-----------|
| H <sup>n</sup> (a) | nH | δ, ppm    | H <sup>n</sup>                      | nH | δ, ppm    |
| DBU 3, 4, 5        | 6  | 1.45-1.54 | DBU 3, 4                            | 4  | 1.56-1.57 |
| DBU 10             | 2  | 1.65      | DBU 5                               | 2  | 1.63-1.64 |
| DBU 6              | 2  | 2.24      | DBU 10                              | 2  | 1.86      |
| DBU 9              | 2  | 3.07      | DBU 6                               | 2  | 2.90-2.93 |
| DBU 11, 2          | 4  | 3.14-3.16 | DBU 9                               | 2  | 3.17      |
|                    |    |           | DBU 11                              | 2  | 3.47      |
|                    |    |           | DBU 2                               | 2  | 3.53-3.55 |
|                    |    |           | -SH/-NH                             | 2  | 4.49      |

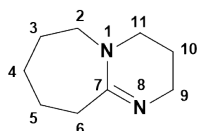

<sup>a</sup> Numbering of protons =

**Table S2.** <sup>13</sup>C NMR shifts and signal assignments in spectra of DBU and solid [DBU-H<sub>2</sub>S] adduct (DMSO-d<sub>6</sub> as internal standard)

| DBU                |           |        | solid [DBU-H <sub>2</sub> S] adduct |           |        |
|--------------------|-----------|--------|-------------------------------------|-----------|--------|
| C <sup>n</sup> (a) | Rel. Int. | δ, ppm | C <sup>n</sup>                      | Rel. Int. | δ, ppm |
| DBU 10             | 1         | 22.37  | DBU 10                              | 1         | 19.01  |
| DBU 5              | 1         | 25.82  | DBU 5                               | 1         | 23.45  |
| DBU 3              | 1         | 28.14  | DBU 3                               | 1         | 26.05  |
| DBU 4              | 1         | 29.13  | DBU 4                               | 1         | 28.16  |
| DBU 6              | 1         | 36.37  | DBU 6                               | 1         | 30.30  |
| DBU 9              | 1         | 43.49  | DBU 9                               | 1         | 36.70  |
| DBU 11             | 1         | 47.51  | DBU 11                              | 1         | 47.71  |
| DBU 2              | 1         | 51.82  | DBU 2                               | 1         | 52.88  |
| DBU 7              | 1         | 159.57 | DBU 7                               | 0.5       | 164.76 |

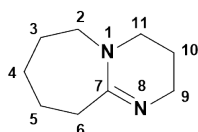

<sup>a</sup> Numbering of carbon atoms =

**Figure S1** a)  $^1\text{H}$ - $^{13}\text{C}$  COSY NMR and, b)  $^1\text{H}$ - $^{13}\text{C}$  HMBC NMR of DBU (in solvent  $\text{d}^6$ -DMSO)

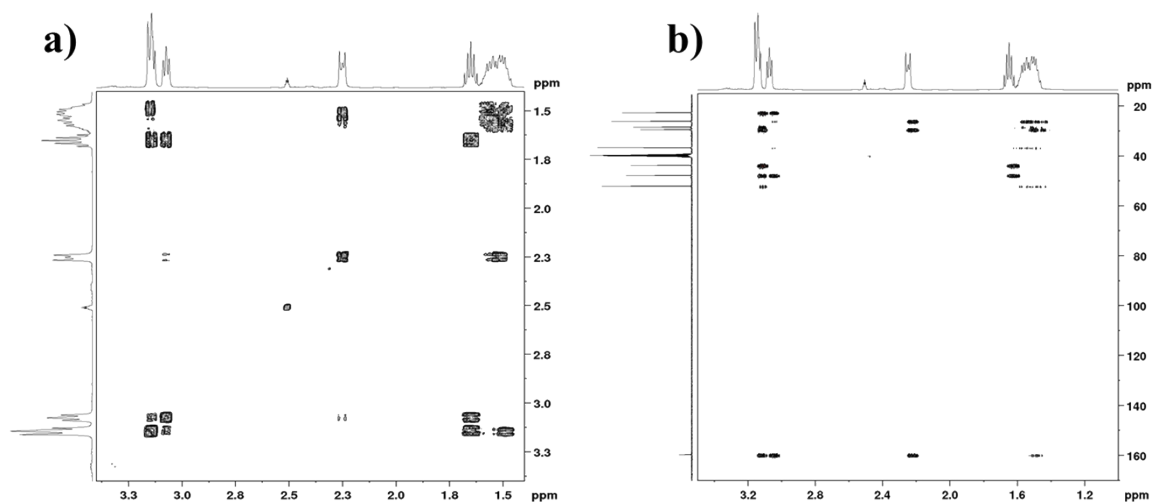

**Figure S2** a)  $^1\text{H}$ - $^{13}\text{C}$  COSY NMR and, b)  $^1\text{H}$ - $^{13}\text{C}$  HMBC NMR solid [DBU- $\text{H}_2\text{S}$ ] adduct (in solvent  $\text{d}^6$ -DMSO)

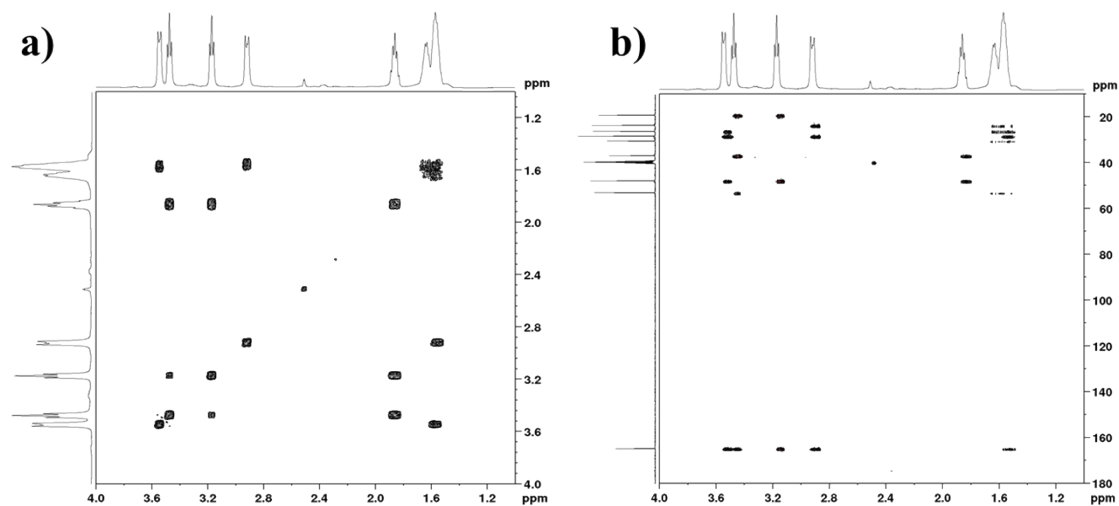

**Figure S3**  $^1\text{H}$  NMR spectra (in  $\text{CDCl}_3$ ) of  $\text{CO}_2$  treated aqueous solution of  $[\text{DBUH}][\text{SH}]$  salt with different water concentrations, a) DBU, b)  $[\text{DBUH}][\text{SH}]$  salt, with different water concentrations such as c) 5 wt.%, d) 10 wt.%, e) 14 wt.%, f) 18 wt.%, and g) 21 wt.%,  $\text{CO}_2$  gas flow rate = 15 ml/min.

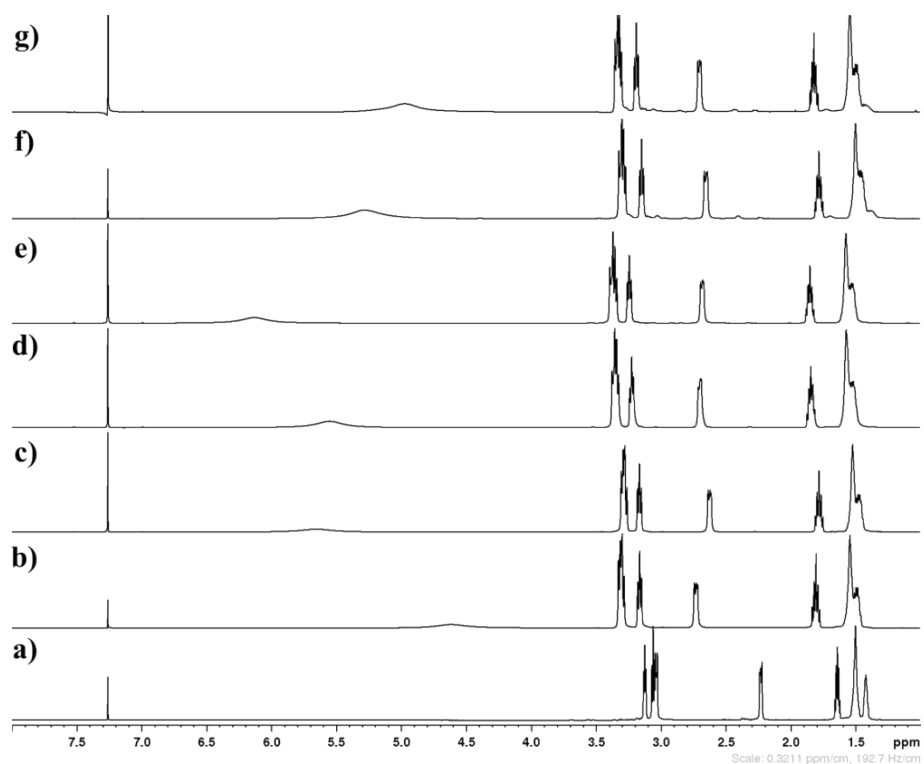

**Figure S4**  $^1\text{H}$  NMR spectra (in  $\text{CDCl}_3$ ) of  $\text{CO}_2$  treated aqueous solution of [DBUH][SH] salt (14 wt.%  $\text{H}_2\text{O}$  with different gas flow rates a) DBU, b) [DBUH][SH] salt, with different gas flow rates such as c) 5 ml/min, d) 10 ml/min, e) 15 ml/min, f) 20 ml/min, and g) 25 ml/min.

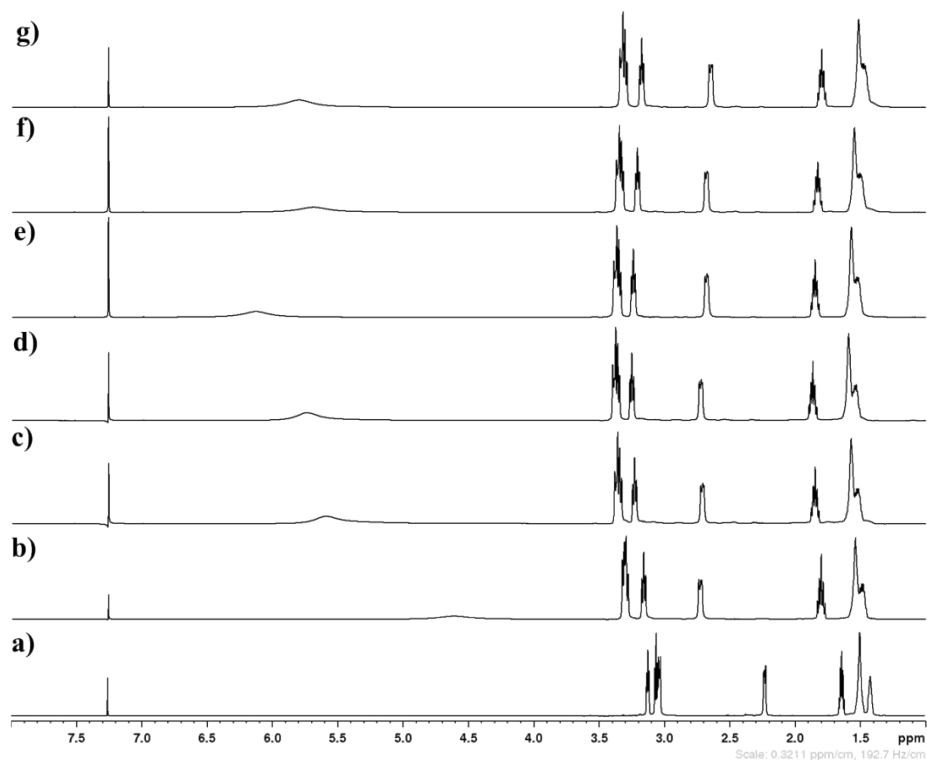

Supplement: c8ra02993h1.pdf [file c8ra02993h1.pdf]
